# Supplementary material for: Contribution of Manure-Spreading Operations to Bioaerosols and Antibiotic Resistance Genes’ Emission
Source: MDPI journal article supplement (doi:10.3390/microorganisms11071797), 2023-07-13
Supplement: s1 [file s1]

# Contribution of Manure-Spreading Operations to Bioaerosols and Antibiotic Resistance Genes' Emission

Mahsa Baghdadi <sup>1,2</sup>, Patrick Brassard <sup>3</sup>, Stéphane Godbout <sup>3</sup>, Valérie Létourneau <sup>1,2</sup>, Nathalie Turgeon <sup>1,2</sup>, Florent Rossi <sup>1,2</sup>, Émie Lachance <sup>1,2</sup>, Marc Veillette <sup>1,2</sup>, Marie-Lou Gaucher <sup>4</sup> and Caroline Duchaine <sup>1,2,5,\*</sup>

## Supplementary Material

### Section S1. Wind tunnel characteristics

A field-scale wind tunnel was built at IRDA (*Institut de recherche et de développement en agroenvironnement, Québec, Canada*) to spread manure in a controlled environment and measure gas, odor and bioaerosol emissions. The wind tunnel was scaled to accommodate agricultural machinery used for small-scale farming operations (8 m width x 30 m length x 4 m height). Air was drawn into the wind tunnel by ten, speed tunable, 24-inch diameter fans who allow wind speed of 0.2 to 1.2 m/s (5 to 30 m<sup>3</sup>/s). The environmental conditions (wind speed, temperature, and humidity) are closely monitored in the tunnel with an INTERCAP® humidity and temperature probe (VAISALA - HMP60). The speed of the fans was always 0.32 m/s which is equal to 8 m<sup>3</sup>/s in this experiment [20]. Inside the wind tunnel, an (8 m width x 22 m length x 0.6 height) strip of soil harvested from the nearby farming sites was disposed. The wind tunnel is accessible by two doors (front and back). Spreader-vehicles' entrance was located at the back of the tunnel (upwind) and spreading was always performed from the back to the front of the tunnel (downwind to upwind) by operating two successive back and forth on the strip of soil for solid manure, and only one pass for pig slurry. All doors were closed during spreading. Because the strip of soil tends dry quickly inside the wind tunnel, the soil was irrigated before each spreading on the entire surface to prevent artificial particle emissions caused by the passage of the spreader-vehicle.

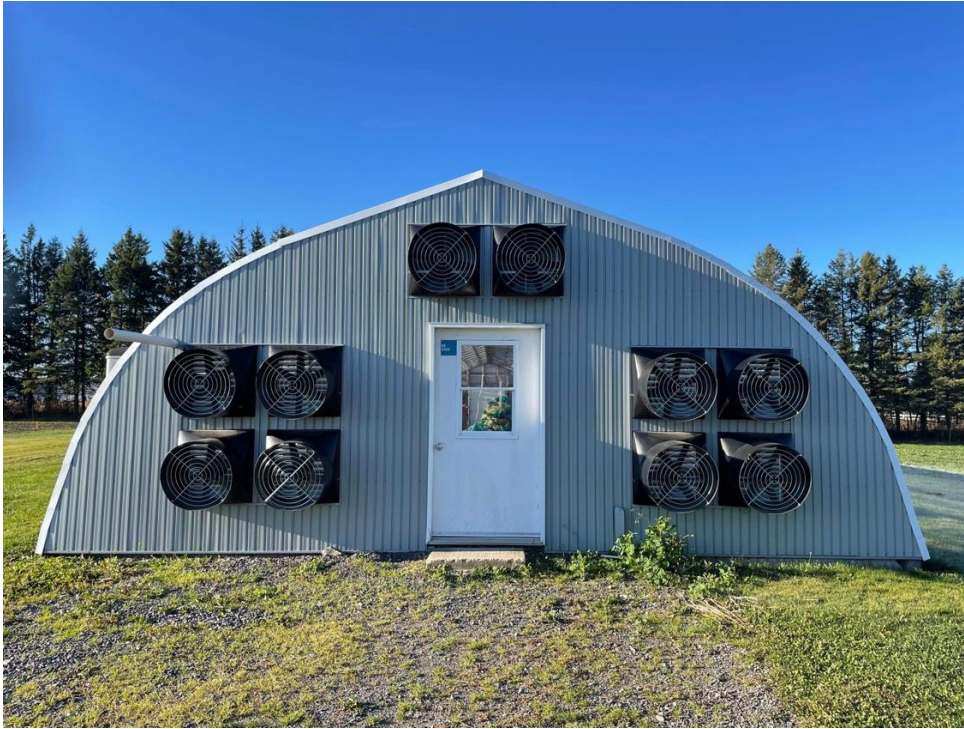

**A.**

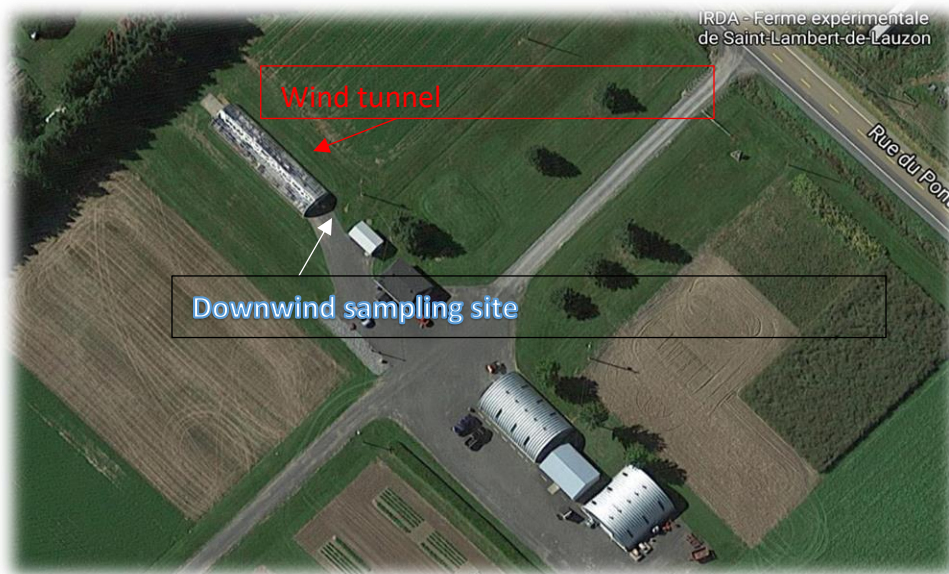

**B.**

**Figure S1. A:** Positioning of the exhaust fans of the wind tunnel and **B:** a view of wind tunnel and the downwind sampling site



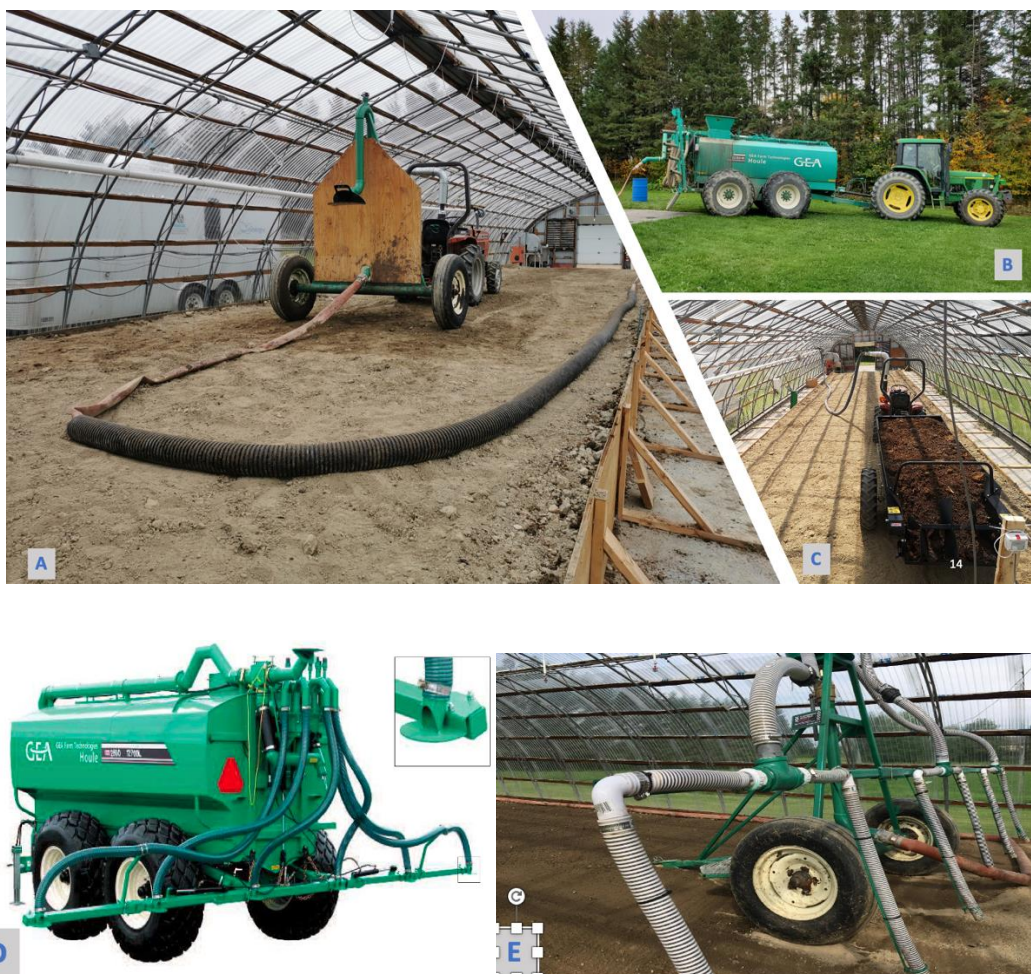

**Figure S2.** Pictures of the different spreaders used to apply different types of manure inside the wind tunnel. Splash plate (A, D) and dribble bar (E) were connected through a hose to a storage tank (B) and used to spread pig slurry. Horizontal beater spreader (C) was used to apply solid (poultry and cow) manure.

**Table S1. Physical characteristics of manure**

|                                  | Number of samplings | Dry Matter content (%) |
|----------------------------------|---------------------|------------------------|
| <b>Cow Manure</b>                | Field trip 6        | 36.5                   |
|                                  | Field trip 7        | 34.8                   |
|                                  | Field trip 8        | 29.3                   |
|                                  | Field trip 9        | 35.4                   |
|                                  | Field trip 10       | 39.4                   |
|                                  | Field trip 11       | 34.5                   |
| <b>Pig slurry - Splash plate</b> | Field trip 12       | 8.89                   |
|                                  | Field trip 13       | 7.90                   |
|                                  | Field trip 14       | 7.91                   |
|                                  | Field trip 15       | 9.04                   |
|                                  | Field trip 16       | 8.47                   |
|                                  | Field trip 17       | 8.55                   |
| <b>Poultry Manure</b>            | Field trip 18       | 47.9                   |
|                                  | Field trip 19       | 48.8                   |
|                                  | Field trip 20       | 59.6                   |
|                                  | Field trip 21       | 54.3                   |
|                                  | Field trip 22       | 50.5                   |
|                                  | Field trip 23       | 53.7                   |
| <b>Pig slurry - Dribble Bar</b>  | Field trip 24       | 6.67                   |
|                                  | Field trip 25       | 6.47                   |
|                                  | Field trip 26       | 6.16                   |
|                                  | Field trip 27       | 6.44                   |
|                                  | Field trip 28       | 11.2                   |
|                                  | Field trip 29       | 11.2                   |

**Table S2. qPCR thermoprotocols**

| <b>qPCR Protocols</b>  | <b>Total bacteria (EUB)</b>     | <b>40 cycles</b> |
|------------------------|---------------------------------|------------------|
| <b>Thermo Protocol</b> | 95 °C                           | 3 min            |
|                        | 95 °C                           | 20s              |
|                        | 62 °C                           | 1 min            |
|                        | Go to step 2                    | 39x              |
|                        | <b><i>Aerococcus</i> Phage</b>  | <b>40 cycles</b> |
| <b>Thermo Protocol</b> | 95 °C                           | 3 min            |
|                        | 95 °C                           | 15s              |
|                        | 60°C                            | 60s              |
|                        | Go to step 2                    | 39x              |
|                        | <b><i>Archaea- rRNA 16S</i></b> | <b>40 cycles</b> |
| <b>Thermo Protocol</b> | 95 °C                           | 3 min            |
|                        | 95 °C                           | 10s              |
|                        | 55.5 °C                         | 20s              |
|                        | 72 °C                           | 25s              |
|                        | Go to step 2                    | 39X              |
|                        | 72 °C                           | 10 min           |
| <b>Melting Curve</b>   | 50 °C                           | 31s              |
|                        | 50 °C                           | 0.02 + 0.5/s     |
|                        | Go to step 9                    | 90X              |
|                        | <b><i>Entero- rRNA 16S</i></b>  | <b>40 cycles</b> |
| <b>Thermo Protocol</b> | 95 °C                           | 3 min            |
|                        | 94 °C                           | 15s              |
|                        | 57 °C                           | 30s              |
|                        | 72 °C                           | 30s              |
|                        | Go to step 2                    | 39X              |
|                        | 72 °C                           | 10 min           |
| <b>Melting Curve</b>   | 50 °C                           | 31s              |
|                        | 50 °C                           | 0.02 + 0.5/s     |
|                        | Go to step 9                    | 90X              |
|                        | <b><i>E.coli- rRNA 16S</i></b>  | <b>40 cycles</b> |
| <b>Thermo Protocol</b> | 95 °C                           | 3 min            |
|                        | 95 °C                           | 15s              |
|                        | 55 °C                           | 30s              |
|                        | 72 °C                           | 30s              |

|                      |              |              |
|----------------------|--------------|--------------|
|                      | Go to step 2 | 39X          |
|                      | 72 °C        | 10 min       |
| <b>Melting Curve</b> | 50 °C        | 31s          |
|                      | 50 °C        | 0.02 + 0.5/s |
|                      | Go to step 9 | 90X          |

**Table S1.** Sequences of primers and probes used for quantification by PCR of total bacteria [44,45], *E. coli*, *Enterococcus* [46], *Archaea* [47,48], the phage *vB\_AviM\_AVP* of *Aerococcus viridans*, ARGs and MGEs [22].

| Targeted microorganisms or antibiotic resistances      | Targeted genes                     | Sequence of primers and probes                                                                                          |
|--------------------------------------------------------|------------------------------------|-------------------------------------------------------------------------------------------------------------------------|
| Total bacteria                                         | 16S rRNA                           | Forward:GACARCCATGCASCACCTG<br>Reverse:GGTAGTCYAYGCMSTAAACG<br>Probe: FAM/TKC GCG TTG/ZEN/CDT CGA ATT AAW CCA C/3IABkFQ |
| <i>Enterococcus</i>                                    | 16S rRNA                           | Forward : CCCTTATTGTTAGTTGCCATCATT<br>Reverse : ACTCGTTGTACTTCCCATTGT                                                   |
| <i>E. coli</i>                                         | 16S rRNA                           | Forward : GTTAATACCTTTGCTCATTGA<br>Reverse : ACCAGGTATCTAATCTCTGTT                                                      |
| <i>Archaea</i>                                         | 16S rRNA                           | Forward : CCGACGTGAGRGRYGAA<br>Reverse : YCCGGCGTTGAMTCCAAT T                                                           |
| Phage <i>vB_AviM_AVP</i> of <i>Aerococcus viridans</i> | DNA polymerase                     | Forward : CTACACAGACATGGGYGGATATG<br>Reverse : CTACACAGACATGGGYGGATATG<br>Probe: TGATGCCTTAGAGGACTACAAGAAGA             |
| Aminoglycoside resistance                              | aac(6')-II (8)                     | Forward : CGACCCGACTCCGAACAA<br>Reverse: GCACGAATCCTGCCTTCTCA                                                           |
| Aminoglycoside resistance                              | aac(6')-Ib (95)                    | Forward: CGTCGCCGAGCAACTTG<br>Reverse: CGGTACCTTGCCTCTCAAACC                                                            |
| Aminoglycoside resistance                              | aac(3)-iid_iii_iif_iiia_iiie (410) | Forward:<br>CGATGGTCGCGGTTGGTC<br>Reverse:<br>TCGGCGTAGTGCAATGCG                                                        |
| Beta-Lactamase resistance                              | blaCMY2 (108)                      | Forward: AAAGCCTCATGGGTGCATAAA<br>Reverse: ATAGCTTTTGTTCAGCATCA                                                         |
| Beta-Lactamase resistance                              | blaGES (120)                       | Forward: GCAATGTGCTCAACGTTCAAG<br>Reverse: GTGCCTGAGTCAATCTTTCAAAG                                                      |
| Beta-Lactamase resistance                              | blaVEB (38)                        | Forward: CCCGATGCAAAGCGTTATG<br>Reverse: GAAAGATTCCTTTATCTATCTCAGACAA                                                   |
| Beta-Lactamase resistance                              | blaTEM (164)                       | Forward: AGCATCTTACGGATGGCATGA<br>Reverse: TCCTCCGATCGTTGTGAGAAGT                                                       |
| Beta-Lactamase resistance                              | blaVIM (147)                       | Forward:<br>GCACTTCTCGCGGAGATTG<br>Reverse :<br>CGACGGTGATGCGTACGTT                                                     |
| Beta-Lactamase resistance                              | blaIMP (324)                       | Forward:<br>GGAATAGAGTGGCTTAATTC<br>Reverse:<br>GGTTAACAAAAACAACCACC                                                    |
| Beta-Lactamase resistance                              | blaMOX (34)                        | Forward: CTATGTCAATGTGCCGAAGCA<br>Reverse: GGCTTGTCTCTTTTCAATAGC                                                        |
| Beta-Lactamase resistance                              | blaSHVII (1110)                    | Forward: TTGACCGCTGGGAAACGG<br>Reverse: TCCGGTCTTATCGGCGATAAAC                                                          |

|                            |               |                                                                                                                            |
|----------------------------|---------------|----------------------------------------------------------------------------------------------------------------------------|
| Beta-Lactamaase resistance | blaOXA (1506) | Forward:CGCAATTATCGGCCTA<br>GAAACT<br>Reverse:<br>TTGGCTTTCCGTCCCATT                                                       |
| Beta-Lactamaase resistance | blaCTX-M-1    | Forward: CGG GCR ATG GCG CAR AC<br>Reverse : TGC RCC GGT SGT ATT GCC<br>Probe: FAM/CCA RCG GGC/ZEN/GCA GYT GGT GAC/3IABkFQ |
| Erythromycine resistance   | ermB (804)    | Forward:<br>GAACACTAGGGTTGTTCTTGCA<br>Reverse:<br>CTGGAACATCTGTGGTATGGC                                                    |
| Erythromycine resistance   | ermF (23)     | Forward: CAGCTTTGGTTGAACATTTACGAA<br>Reverse: AAATTCCTAAAATCACAACCGACAA                                                    |
| Erythromycine resistance   | ermT (137)    | Forward:GTTCACTAGCACTATTTTAATGACA<br>GAAGT<br>Reverse:<br>GAAGGGTGTCTTTTAATACAATTAACGA                                     |
| Erythromycine resistance   | ermX (209)    | Forward:GCTCAGTGGTCCC<br>CATGGT<br>Reverse:<br>ATCCCCCGTCAACGTT                                                            |
| Erythromycine resistance   | erm35 (815)   | Forward: CCTTCAGTCAGAACCGGCAA<br>Reverse: GCTGATTGACAGTTGGTGGTG                                                            |
| Tetracycline resistance    | tet32 (54)    | Forward: CCATTACTTCGGACAACGGTAGA<br>Reverse: CAATCTCTGTGAGGCATTTAACA                                                       |
| Tetracycline resistance    | tetA (180)    | Forward: CTCACCAGCTGACCTCGAT<br>Reverse: CACGTTGTTATAGAAGCCGCATAG                                                          |
| Tetracycline resistance    | tetL (195)    | Forward:ATGGTTGTAGTTGCGCG<br>CTATAT<br>Reverse:<br>ATCGCTGGACCGACTCCTT                                                     |
| Tetracycline resistance    | tetO (192)    | Forward :CAACATTAACGGAAAGTTTATTG<br>TATACCA<br>Reverse: TTGACGCTCCAAATTCATTGTATC                                           |
| Tetracycline resistance    | tetQ (185)    | Forward:CGCCTCAGAAGTAAGTTCATAC<br>ACTAAG<br>Reverse:<br>TCGTTTCATGCGGATATTATCAGAAT                                         |
| Tetracycline resistance    | tetS (200)    | Forward:TTAAGGACAAACTTCTGAC<br>GACATC<br>Reverse:<br>TGTCTCCCATTTGTTCTGGTTCA                                               |
| Tetracycline resistance    | tetW (191)    | Forward:<br>ATGAACATTCCCACCGTTATCTTT<br>Reverse:<br>ATATCGGCGGAGAGCTTATCC                                                  |
| Tetracycline resistance    | tetX (196)    | Forward: AAATTTGTTACCGACCGGAAGTT<br>Reverse: CATAGCTGAAAAATCCAGGACAGTT                                                     |
| Tetracycline resistance    | tetM (1513)   | Forward:<br>GGAGCGATTACAGAATTAGGAAG<br>C Reverse:<br>TCCATATGTCCTGGCGTGTG                                                  |
| Vancomycin resistance      | vanA (1514)   | Forward: GGGCTGTGAGGTCGGTTG<br>Reverse: TTCAGTACAATGCGGCCGTTA                                                              |
| Vancomycin resistance      | vanB (211)    | Forward:<br>TTGTCGGCGAAGTGGATCA<br>Reverse:<br>AGCCTTTTCCGGCTCGTT                                                          |
| Vancomycin resistance      | vanRA (216)   | Forward:<br>CCCTTACTCCCACCGAGTTTT<br>Reverse:<br>TTCGTCGCCCCATATCTCAT                                                      |
| Vancomycin resistance      | vanSA (218)   | Forward: CGCGTCATGCTTTCAAAATTC<br>Reverse: TCCGCAGAAAGCTCAATTGT                                                            |
| Sulfonamide resistance     | sul1 (363)    | Forward:<br>GCCGATGAGATCAGACGTATT<br>G Reverse:<br>CGCATAGCGCTGGGTTTC                                                      |

|                                   |              |                                                                                                                     |
|-----------------------------------|--------------|---------------------------------------------------------------------------------------------------------------------|
| Sulfonamide resistance            | sul2 (133)   | Forward:<br>TCATCTGCCAAACTCGTCGTTA<br>Reverse:<br>GTCAAAGAACGCCGCAATGT                                              |
| Quinolone resistance              | qnrB (1202)  | Forward: TCACCACCCGCACCTG<br>Reverse: GGATATCTAAATCGCCCAGTTCC                                                       |
| Colistine resistance              | mcr-1        | Forward: ATGGCAGGTCTATGATA<br>Reverse: CGGATAATCCACCTTAACA<br>Probe: FAM/CTA CAG ACC/ZEN/GAC CAA GCC GA/3IABkFQ/-3' |
| Mobile Genetic Element resistance | is26 (1546)  | Forward:<br>ATGGATGAAACCTACGTGAAGGTC<br>Reverse:<br>CGGTACTTAATCTGTCCGGTGTCA                                        |
| Mobile Genetic Element resistance | tnpA (207)   | Forward: AATTGATCGGCACGGCTTAA<br>Reverse: TCACCAAACCTGTTATGGAGTCGTT                                                 |
| Mobile Genetic Element resistance | int1-A (336) | Forward:<br>CGAAGTCGAGGCATTTCTGTG<br>Reverse:<br>GCCTTCCAGAAAACCGAGGA                                               |

**Table S4.** Insert sequences used to construct standard curves that was used for qPCR detection of targeted ARGs and MGEs

| Genes                      | Insert sequences                                                                                                                                                                                                                                                                                                                                                                                                                                                                                                                                                                                                                                                                                                                                                                                                                                                                                           |
|----------------------------|------------------------------------------------------------------------------------------------------------------------------------------------------------------------------------------------------------------------------------------------------------------------------------------------------------------------------------------------------------------------------------------------------------------------------------------------------------------------------------------------------------------------------------------------------------------------------------------------------------------------------------------------------------------------------------------------------------------------------------------------------------------------------------------------------------------------------------------------------------------------------------------------------------|
| aac(6')-II                 | ATCTTCTCCGCACGAATCCTGCCTTCTCATAGCAGCGTATGGCTCGATGGTTGTTCGGAGTCGGGTCGGTCTGAATCT                                                                                                                                                                                                                                                                                                                                                                                                                                                                                                                                                                                                                                                                                                                                                                                                                             |
| aac(6')-Ib                 | TTAGGCATCACTGCGTGTTCGCTCGAATGCCTGGCGTGTGTTGAACCATGTACACGGCTGGACCATATGGGGTGGTTA                                                                                                                                                                                                                                                                                                                                                                                                                                                                                                                                                                                                                                                                                                                                                                                                                             |
| aac(3)-iid_iii_iif_iaa_iee | CTAACCTGAAGGCTCGCAAGAGCGCTCGACGGCTCTGTCGGAGGCACGATCGGAGTGGTTCGAAATGCTTCTCAA<br>GATAGGTGACGCCGACGTCACGATGTCCTGCGCGTCGAACAGGTAGCACTGAGCAAGCCACGACACCTTCTCGAT<br>GGCGACCGAGCTTACGTAAGCATTGCTATAGTTTCAACCGCATCCGGCTTTCCTTCGATAGCAAGCAATCGAGAATG<br>CCGTTTGAATCGTAATCCGATGCCGTTTCCAGGCGACTTACCCTCTCTTCCAAGCATCGGCATCTACATCGTCAACCCAC<br>CGTTTGTGGGGATATCGGCAACCGCC                                                                                                                                                                                                                                                                                                                                                                                                                                                                                                                                              |
| blaCMY2                    | CCCCGAGTGAAAGCCTCATGGGTGCATAAAAACGGGCTCCACTGGTGGATTGGCAGTACGTAGCCTTCGTTCCAGAAAA<br>AACCTTGGCATCGTGATGCTGGCAACAAAGCTATCCTAACCTG                                                                                                                                                                                                                                                                                                                                                                                                                                                                                                                                                                                                                                                                                                                                                                             |
| blaGES                     | GCAGCGTTTTGCAATGTGCTCAACGTTCAAGTTTCCGCTAGCCGCGCTGGTCTTTGAAAGAATTGACTCAGGCACCGAGCGGGG                                                                                                                                                                                                                                                                                                                                                                                                                                                                                                                                                                                                                                                                                                                                                                                                                       |
| blaVEB                     | ACTTCCATTTCCCGATGCAAAAGCGTTATGAAATTTCGATTGCTTTAGCCGTTTGTCTGAGATAGATAAAGGGAATCTTCTTTTGAACAA                                                                                                                                                                                                                                                                                                                                                                                                                                                                                                                                                                                                                                                                                                                                                                                                                 |
| blaTEM                     | GTCACAGAAAAGCATCTTACGGATGGCATGACAGTAAGAGAATTATGCACTGCTGCCATAACCATGAGTGATAACACTGCTGCCAATTAC<br>TTCTGACAACGATCGGAGGACCGAAGGAGC                                                                                                                                                                                                                                                                                                                                                                                                                                                                                                                                                                                                                                                                                                                                                                               |
| blaVIM                     | ATGTTCAAACCTTTTGAAGTAAGTTATTGGTCTATTGACCGCTCTATCATGGCTATTGGCAGTCCGCTCGCTTTTCCGTAAGATTCTAGCGGTG<br>AGTATCCGACAGTCAGCGAAATTCGGTTCGGGGAGGTCCGGCTTACCAGATTGCCGATGGTGTGTTGGTTCGATATCGCAACGCACTGCTTT<br>GATGGCGCAGTCTACCCGTCGAATGGTCTCATGTGCGGTGATGGTGATGAGTTGCTTTTGAATTGATACAGCGTGGGTGCGAAAAACACA<br>GCG                                                                                                                                                                                                                                                                                                                                                                                                                                                                                                                                                                                                        |
| blaIMP                     | ATGAGCAAGTTATCTGTATTCTTTATATTTTGTGTTTGTAGCATTGCTACCGCAGCAGAGCCTTGGCAGATTTAAAAATTGAAAACTTGAT<br>GAAGGGGTTTATGTTCTACTACTGTTTGAAGAAGTTAACGGGTGGGGCGTTTTCTTAACATGGTTTGGTTGTTCTGTAGATGCTGAAGCTTA<br>TCT<br>AATTGACACTCCATTTACGGCTAAAGATACTGAAAGTTAGTCACTTGGTTTGTGGAACGTGGCTATAAAATAAAGGCAGTATTTCTCTC<br>ATTT<br>TCATAGTGACAGCACGGGC                                                                                                                                                                                                                                                                                                                                                                                                                                                                                                                                                                             |
| blaMOX                     | ATGCAACAACGCAATCCATCCTGTGGGGCGCTCTGGCCACCCTGATGTGGCCGGTCTGGCCCATGCAGGTGAGACTTACCGGTGATCCC<br>CTGCGCCCCGTGGTGGATGCCAGCATCCGGCCGTGCTCAAGGAGCACAGGATCCCGGGCATGGCGGTGGCCGTGCTCAAGGATGGCAAGGC<br>CCACTATTCAACTACGGTGTGGCCGATCGGGAGCGCGCAGTCGGTGTGACGAGCAGACCTGTTTCGAGATAGGCTCCGTGAGCAAGCCCT<br>GACCGCGACCTAGGAGCCTATGCGGTGGTCAAGGGAGCGATGCAACTGGATGACAAGGCGAGCCGGCAGCCCCCTGGCTCAAGGGATCCG<br>CCTTTGACAGCATCACCATGGGGGAGTGGCTACCTACAGCGCGGGCGGCTTGCCTGCAATTCCCGAGGAGGTGGATTGCTCGAGAAGA<br>TGCAGGCTACTACCGCAGTGGACCCAGCCTACTCGCGGGTTCCATCGCCAGTACTTAACCCAGCATAGGGCTTTCGGCCAC CTGG<br>CGCGGAGCAGCATGAAGCAGCCGTTTGGCCAGTGTAGTGAGCAGACGCTCTGCGGGGCTTGGCTGCACCCAC                                                                                                                                                                                                                                                     |
| blaSHVII                   | TTAGCGTTGCCAGTGTGATCAGCGCCGCGCGATCCCGCGATTGCTGATTTCGCTCGGCCATGCTCGCCGGCGTATCCCGCAGA<br>TAAATCACCACAATGCGCTCTGCTTTGTTATTTCGGGCCAAGCAGGGCGACAATCCCGCGCGCACCCCGCTTGCTAGC-TCCGGTCTTATC<br>GGGATATAAC-CAGCCCGCGGACGACGAGCGGATCAACGGTCCGGCGACCCGATCGTCCACCATCCACTGCAGCAGTCCGCTTG<br>CGAACGGGCGCTCAGACGCTGGCTGGTACGACGCTTGGCAGGGTCCGCGCCATGCTGGCCGGGGTAGTGGTGTGCGGGCGCTCGC<br>CGGGAAGCGCTCATTCAGTTCCGTTTCCAGCGGTCAAGGCGGGTGACGTTGTGCCGATCTGGCGCAAAAGGCAGTCAATCCTGGC<br>GGGCGGCCGAGCGTGGCCAGCAGCAGATTGGCGGCGCTGTTATCGCTCATGGTAATGGCGGGCGCGCAGAGTTCCGCGACCGTCAATGC<br>CGTCGGCAAGGTGTTTTTCGCTGACCGGGAGTAGTCCACAGATCCTGCTGGCGATAGTGATCTTTTCGCTCAGCTGTTCGTCAACCG<br>CATCCACCCGCGCAGCACTGCGCGCAGAGCACTACTTAAAGGTGCTCATCATGGGAAAGCGTTCATCGGCGCGCAGGCGGTCAAGC<br>GTGCGGCGCTGGCCAGATCCATTCTATCATGCTACCGCGCCGACAGCTGGCTTTCGCTTTGTTTAAATTGCTCAAGCGGCTGCGGG<br>CTGGCGTGTACCGCCAGCGCGAGGTGGCTAACAGGGAGATAATACAGCGCAATATAACGCAT |
| blaOXA                     | ATGAACATTAAAGCACTTACTTATAACAAGCGCTATTTTATTTACGCTGCTCACCTTATATAGTGACTGCTAATCCAAATCACAGCGC<br>TTCAAATCTGATGTAAAGCAGAGAAAAATTAAATAATTTTAAACGAAGCACACACTACGGGTGTTTTAGTTATCCAAACAGGCCAAATC<br>AACAAGCATGGTAATGATCTTGTCTGTGCT                                                                                                                                                                                                                                                                                                                                                                                                                                                                                                                                                                                                                                                                                    |



|            |                                                                                                                                                                                                                                                                                                                                                                                                                                                    |
|------------|----------------------------------------------------------------------------------------------------------------------------------------------------------------------------------------------------------------------------------------------------------------------------------------------------------------------------------------------------------------------------------------------------------------------------------------------------|
| blaCTX-M-1 | TGCACCGGTGGTATTGCCTTTCATCCATGTCAACAGCTGCGCCCGTTGGCTGTCGCCAATGCTTTACCCAGCGTCAGATTCCGCAGAGT<br>TTGCCCAATTGCCCG                                                                                                                                                                                                                                                                                                                                       |
| ermB       | ATGAACAAAAATATAAAATATTCTCAAAACCTTTTAAACGAGTGAAAAAGTACTCAACCAAATAATAAAACAATTGAATTTAAAGAAACCGATA                                                                                                                                                                                                                                                                                                                                                     |
|            | CCGTTTACGAAATTTGGAACAGGTAAGGGGCATTAAACGACGAAACTGGCTAAAATAAGTAAACAGGTAACGTTCTATTGAATTAGACAGTCAT<br>CTATTCAACTTATCGTCAGAAAAATTAACACTGAATACTCGTGTCACCTTAAATTCACCAAGATATTCTACAGTTTCAATTCCCTAACAAACAGA<br>GGTATAAAATTGTTGGGAATATTCTTACCATTAAAGCACACAAATTATTAATAAAGTGGTTTTGAAAGCCATGCGCTGACATCTATCTGA<br>TTGTTGAAGAAGGATTCTACAAGCGTACCTTGGATATTACC                                                                                                       |
| ermF       | TGAAAACGACACAGCTTTGGTTGAACATTTCAGAAAATATTCTCTGATGCCGAAATGTTCAAGTTGTCGGTTGTGATTTTAGGAATTTTGC<br>AGTTCCG                                                                                                                                                                                                                                                                                                                                             |
| ermT       | AATACAAATCGTTCACTAGCACTATTTTAAATGACAGAAGTTGATATATCCATATTAAGTAAATCCCTAGAGAATACTTTTATCCAAAACTTA G<br>AGTTAATAGCTCGTTAATTGTATTAAAAAGACACCCCTTCAAAAATATCA                                                                                                                                                                                                                                                                                              |
| ermX       | GATGATGACGGCTCAGTGGTCCCATGGTTTCACATTTTACCTGGGTTCTCGGGTACCAAGGTCTGCTTTCCGGCCACAGCCAAACGTTGA CG<br>GGGGGATCTTAGTGATC                                                                                                                                                                                                                                                                                                                                 |
| erm35      | GAATTCAGTATTCACTGTAAGAAGTAAATAATGACAAAAAGAAATGGCCGTCGTTTACGGGTCAGCACTTTACTATTGACAAAGTGCTT<br>ATTAAAGATGCAATAAAAGAATCAAAATATAAATCAACACGATACAGTTTAGATATTGGAGCTGGTAAGGGTTTTCTAACTGTTCATCTCTAAA<br>A<br>AATGTCGATAAAGTTATTGCCATTGAAACGATGTTGCATTAAAGTCAACATTTGCGCAAAAAATTCATTACGCTCAAAAACGTTCAAGTGGTTAG<br>TTGTGATTATAGAAATTTTGGTTCCGAAAGTTCCATTAAAGTAGTTTCAAAATATTCCTTTTGGTATTACATCTGATATTTTTAGTAGTCTG ATG<br>TTTGAATAATGTCGAATATTTTCTATGCGGTTCATTAAT |
| tet32      | TAATCCCATGCCATTACTTCGGACAACCGTAGAGCCGCAAAAGCCGGAGCAAAAGGGAAGCCCTGTTAAATGCCCTCACAGAGATTGCTGA<br>TACAGA                                                                                                                                                                                                                                                                                                                                              |
| tetA       | ACTGGCGCGCTCACAGCCTGACCTCGATCGTCGGACCCCTCCTCTTCACGGCGATCTATGCGGCTTCTATAACAACGTGGAACGGGT<br>GG                                                                                                                                                                                                                                                                                                                                                      |
| tetL       | AGCACTCGTAATGGTTGTAGTTGCGCGCTATATCCAAAGGAAAAATAGGGTAAAGCATTGGTCTTATTGGATCGATAGATAGCCATGGGA GAA<br>GGAGTCGGTCCAGCGATTGGTGGAAAG                                                                                                                                                                                                                                                                                                                      |
| tetO       | GCAGGAAAGACAACATTAACGGGAAAGTTTATTGTATACCAAGTGGTGAATTCGAGAAGTACAGGAGCGTAGATGAAGGCACAACAAGGACA GAT<br>ACAATGAATTTGGAGCGTCAAAGGGGAATCA                                                                                                                                                                                                                                                                                                                |
| tetQ       | GTAAGACTACGCTCAGAAAGTAAAGTTACATACTAAGGGCTTAGGGCTTTTATGGTCAAGCCATGCGGGTATCAAAATAACAAAAGGCGA TTA<br>TTCTGATAATATCCGATGAACGAAAAAGATAAA                                                                                                                                                                                                                                                                                                                |
| tetS       | TATCAAGATATTAAGGACAACCTTTCTGACGACATCATAAATTAAGCAGACTGTGAATCTAAATTTGAAACCTTATGTAAATAGATTACTGAA<br>CCA<br>GAACAATGGGAGACAGTAATTGTGG                                                                                                                                                                                                                                                                                                                  |
| tetW       | CCCTGCGGAAAAATGAACATTTCCACCGTTATCTTTATCAACAAGATCGACCAAGTTGGCGTTGATTGTCAGGGCGGTATCAGTCTGTTCG GG<br>ATAAGCTCTCCGCGATATTATCATCAAG                                                                                                                                                                                                                                                                                                                     |
| tetX       | GTTTCATTGTCATAGCTGAAAAAATCCAGGACAGTTTATCTCTGTTGATGAATATCGGCTTGATATITGAAAGTACCTGTTTCTTCAACTTC CG<br>TGTCGGTAACAAATTTTCTTACCTTG                                                                                                                                                                                                                                                                                                                      |
| tetM       | ATGGAGGAAAAATCACATGAAAATTATTAATATTGGAGTTTAGCTCATGTTGATGCGGGAAAAACTACCTTAACAGAAAGCTTATTATATAAC<br>AGT                                                                                                                                                                                                                                                                                                                                               |
| vanA       | TCACCCCTTTAACGCTAATACGATCAAGCGGTCAATCAGTTTCGGGAAGTGCAATACCTGCAGCGCCATCATACGGGGATAACGACTGTA TGA<br>CGTGAAACCGGGCAGAGTATTGACTTCG                                                                                                                                                                                                                                                                                                                     |
| vanB       | GATGATTGTGATGTCGGCGAAGTGGATCAAATCCGGTTAGGCCACGGTATCTTCCGATCCATCAGGAAAACGAGCCGAAAAAGGCTCA<br>GAGAATGC                                                                                                                                                                                                                                                                                                                                               |
| vanRA      | TGCTGAAATATTCTGTCGCCCATATCTCATGAAATAGCAGCTCGGAGCTAACCACATTCCTTGTTCACAGAGGATTGCGAGTATTGAA AAC<br>TCGGTGGGAGTAAGGGATAACTGCT                                                                                                                                                                                                                                                                                                                          |
| vanSA      | TATTCTATGTCGCGTATGCTTTCAAAATTCGCAAAATACTTTGACGAGATAAATACCGGATGATGTACTTATTACAGAACGAAGATAAACA AA<br>TTGAGCTTTCTGCGGAAATGGATGTT                                                                                                                                                                                                                                                                                                                       |
| sul1       | ATGGTGACGGTGTTCGGCATTCTGAATCTCACCGAGGACTCTTCTTCATGATGAGAGCCGGCGGCTAGACCCCGCCGGCTGTCAACCGC G<br>CGCATCGAAATGCTGCGAGTCGGATCAGACGTCGTGGATGTCGGACCGCGCCGACGCAATCCGGACGCGAGGCTGTATCGCCG                                                                                                                                                                                                                                                                 |
| sul2       | ATGAATAAATCGCTCATCATTTTCGGCATCGTCAACATAACCTCGGACAGTTTCTCCGATGGAGGCCGATCTGGCGCCAGACGACGCC<br>ATTGCGCAGGCGCTAAGCTGATGGCCGAGGGGCGAGATGTGATCGACCTCGGTCCGGCATCCAGCAATCCCGACGCCGCGCTGTTT<br>CGTCCGACACAGAAATCGCGCTATCGCGCCGGTGTGGACGCGCTCAAGGCAGATGGCATTCCTGCTCGCTCGACAGTTATCAACCC<br>GCGACCAAGCCTATGCTTGTGCGGTGGTGTGGCCTATCTCAATGATATTCGCGGTTTTCAGACGCTGCGTTCTATCCGCAATTGGCG AAA                                                                        |
| qnrB       | TTAACCCATGACAGCGATACCAAGACGTTCCAGGAGCAACGATGCCTGGTAGCTGTCCAGTTTGACGCTTGCAAAATCAACCCCGC                                                                                                                                                                                                                                                                                                                                                             |
| mcr-1      | ATGGCACGGTCTATGATACGACCATGCTCCTCAAAATGCCCTACAGACCGACCAAGCCGAGACCAAGGATCTATTAACGCGAGCGTTTATCA<br>TGCATATCATTTGGTTTGGGTGTGCTACCAAGTTTGGCTTTTGTAAAGGTGGATTATCCG                                                                                                                                                                                                                                                                                       |
| is26       | TTACATTTTAAAAACTCTGCTTACCAGGCGCATTTTCGCCAGGGGATCACCATAATAAAATGCTGAGGCTTGGCTTTGCGTAGTG<br>CACGCATCACTCAATACCTTTGATGGTGGCGTAAGCCGCTCTCATGGAATTAATCCAGCGTGGCGCGGATTATCCGTTTCAGT<br>TTGCCATGATCGCATTCATCAACGTTGTTT                                                                                                                                                                                                                                     |
| tnpA       | TTTATCTGCAATTTGATGCGGACGGCTTAACCTTAGATATCTGGTTACGAAAGAAATGGGATACGCAAGCAGCCTATGCTTTCTTAA<br>AACGACTCCATAAACAGTTTGGTGAGCGGAAAGCA                                                                                                                                                                                                                                                                                                                     |
| int1-A     | ATGAAACCCGCACTGGCCGTTACCACCGCTGCGTTCCGTTCAAGGTTCTGGACCAAGTTGCGTGAGCGCATACGCTACTTGCATT<br>ACAGCTTACGAACCGAACAGGCTTATGTCCACTGGGTTCTGCTCTTACCGTTTCCACGGTGTGCGTACCCGGCAACCTTGGGCAGCA<br>G                                                                                                                                                                                                                                                              |

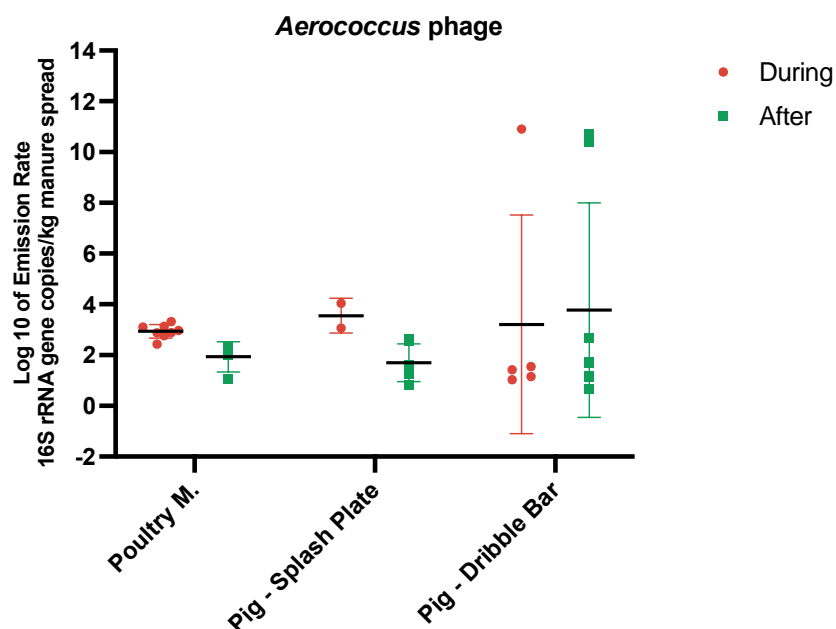

**Figure S3. Emission rate of the phage *vB\_AviM\_AVP* of *Aerococcus viridans* for tested manure types;** No difference was observed among the paired groups regarding emission rates of the phage.

## References

20. Desbiens, V.; Brassard, P.; Baghdadi, M.; Létourneau, V.; Turgeon, N.; Duchaine, C.; Trivino Arevalo, A.; Godbout, S. Comparison of Air Contaminants Emissions from Two Pig Slurry Spreading Methods in a Controlled Environment—Technical Library of the CSBE-SCGAB. Available online: <https://library.csbe-scgab.ca/all-publications/5968:comparison-of-air-contaminants-emissions-from-two-pig-slurry-spreading-methods-in-a-controlled-environment> (accessed on 23 January 2023).
22. Stedtfeld, R.D.; Guo, X.; Stedtfeld, T.M.; Sheng, H.; Williams, M.R.; Hauschild, K.; Gunturu, S.; Tift, L.; Wang, F.; Howe, A.; et al. Primer Set 2.0 for Highly Parallel QPCR Array Targeting Antibiotic Resistance Genes and Mobile Genetic Elements. *FEMS Microbiol. Ecol.* **2018**, *94*, fiy130. <https://doi.org/10.1093/FEMSEC/FIY130>.
44. Oliver, J.P.; Gooch, C.A.; Lansing, S.; Schueler, J.; Hurst, J.J.; Sassoubre, L.; Crossette, E.M.; Aga, D.S. Invited Review: Fate of Antibiotic Residues, Antibiotic-Resistant Bacteria, and Antibiotic Resistance Genes in US Dairy Manure Management Systems. *J. Dairy Sci.* **2020**, *103*, 1051–1071. <https://doi.org/10.3168/JDS.2019-16778>.
45. Bach, H.J.; Tomanova, J.; Schlöter, M.; Munch, J.C. Enumeration of Total Bacteria and Bacteria with Genes for Proteolytic Activity in Pure Cultures and in Environmental Samples by Quantitative PCR Mediated Amplification. *J. Microbiol. Methods* **2002**, *49*, 235–245. [https://doi.org/10.1016/S0167-7012\(01\)00370-0](https://doi.org/10.1016/S0167-7012(01)00370-0).
46. Malinen, E.; Kassinen, A.; Rinttilä, T.; Palva, A. Comparison of Real-Time PCR with SYBR Green I or 5'-Nuclease Assays and Dot-Blot Hybridization with RDNA-Targeted Oligonucleotide Probes in Quantification of Selected Faecal Bacteria. *Microbiology* **2003**, *149*, 269–277. <https://doi.org/10.1099/MIC.0.25975-0>.
47. Baker, G.C.; Smith, J.J.; Cowan, D.A. Review and Re-Analysis of Domain-Specific 16S Primers. *J. Microbiol. Methods* **2003**, *55*, 541–555. <https://doi.org/10.1016/j.mimet.2003.08.009>.
48. Robb, F.T.; DasSarma, S.; Fleischmann, E.M. *Archaea: A Laboratory Manual*; Cold Spring Harbor Laboratory: New York, NY, USA, 1995; pp. 217.
